# Supplementary material
Source: PubMed Central journal article supplement (PMC3298177)
Supplement: supp_78.6.1752_AEM7454-11_TableS1.pdf [file supp_78.6.1752_AEM7454-11_TableS1.pdf]

**Supplemental Table 1.** List of genes that had more than 1.5-fold change in expression in *Escherichia coli* K12 associated with lettuce leaves.

| Gene Number                                                       | Fold Change | Symbol                         | Function                                                                                                                              |
|-------------------------------------------------------------------|-------------|--------------------------------|---------------------------------------------------------------------------------------------------------------------------------------|
| <i>Amino acid biosynthesis</i>                                    |             |                                |                                                                                                                                       |
| B4254                                                             | 3.0         | <i>argI</i>                    | ornithine carbamoyltransferase 1                                                                                                      |
| B1748                                                             | 2.7         | <i>argD</i>                    | succinylornithine aminotransferase                                                                                                    |
| B0674                                                             | 2.6         | <i>asnB</i>                    | asparagine synthetase B                                                                                                               |
| B3213                                                             | 2.3         | <i>gltD</i>                    | glutamate synthase, small subunit                                                                                                     |
| B3281                                                             | 2.2         | <i>aroE</i>                    | dehydroshikimate reductase                                                                                                            |
| B3870                                                             | 2.2         | <i>glnA</i>                    | glutamine synthetase                                                                                                                  |
| <i>Biofilm</i>                                                    |             |                                |                                                                                                                                       |
| B0806                                                             | 38.1        | <i>ybiM</i><br>( <i>McbA</i> ) | protein involved in colanic acid production                                                                                           |
| B1112                                                             | 33.2        | <i>ycfR</i><br>( <i>bhsA</i> ) | protein involved in stress resistance and<br>biofilm formation                                                                        |
| B1060                                                             | 3.6         | <i>yceP</i>                    | biofilm formation regulatory protein                                                                                                  |
| B1165                                                             | 2.8         | <i>ymgA</i>                    | protein involved in biofilm formation                                                                                                 |
| <i>Biosynthesis of cofactors, prosthetic groups, and carriers</i> |             |                                |                                                                                                                                       |
| B3073                                                             | 4.0         | <i>ygiG</i>                    | putrescine--2-oxoglutarate aminotransferase                                                                                           |
| B2530                                                             | 2.8         | <i>IscS</i>                    | cysteine desulfurase                                                                                                                  |
| B3973                                                             | 2.6         | <i>birA</i>                    | biotin operon repressor                                                                                                               |
| <i>Cell envelope</i>                                              |             |                                |                                                                                                                                       |
| B1042                                                             | 20.0        | <i>csgA</i>                    | curlin major subunit, coiled surface<br>structures, cryptic                                                                           |
| B1041                                                             | 14.3        | <i>csgB</i>                    | minor curlin subunit precursor, nucleator for<br>assembly of adhesive surface organelles                                              |
| B1743                                                             | 8.7         | <i>spy</i>                     | periplasmic protein related to spheroblast<br>formation                                                                               |
| B1110                                                             | 5.9         | <i>ycfJ</i>                    | putative zinc peptidase                                                                                                               |
| B1283                                                             | 5.6         | <i>osmB</i>                    | lipoprotein, osmotically inducible                                                                                                    |
| B4045                                                             | 5.3         | <i>yibJ</i>                    | putative stress-response protein                                                                                                      |
| B1806                                                             | 3.2         | <i>yeaY</i>                    | putative outer membrane lipoprotein                                                                                                   |
| B0786                                                             | 2.0         | <i>ybhL</i>                    | putative transport protein                                                                                                            |
| <i>Cellular processes</i>                                         |             |                                |                                                                                                                                       |
| B1305                                                             | 23.3        | <i>pspB</i>                    | phage shock protein, putative inner<br>membrane protein                                                                               |
| B1304                                                             | 21.5        | <i>pspA</i>                    | phage shock protein, putative inner<br>membrane protein                                                                               |
| B1306                                                             | 14.8        | <i>pspC</i>                    | phage shock protein: activates phage shock-<br>protein expression                                                                     |
| B1307                                                             | 13.3        | <i>pspD</i>                    | phage shock protein<br>mRNA interferase, toxin of the MqsR-YgiT                                                                       |
| B3022                                                             | 6.4         | <i>ygiU</i>                    | toxin-antitoxin system                                                                                                                |
| B1308                                                             | 5.1         | <i>pspE</i>                    | phage shock protein E                                                                                                                 |
| B1530                                                             | 4.5         | <i>marR</i>                    | repressor of mar operon<br>toxin of the RelE-RelB toxin-antitoxin system<br>and cofactor to enhance the repressor activity<br>of RelB |
| B1563                                                             | 4.1         | <i>relE</i>                    | antitoxin of the RelE-RelB toxin-antitoxin<br>system and DNA binding transcriptional<br>repressor                                     |
| B1564                                                             | 3.9         | <i>relB</i>                    | MqsA antitoxin of the MqsRA toxin-antitoxin<br>system and DNA transcriptional repressor                                               |
| B3021                                                             | 3.7         | <i>ygiT</i>                    | bacterioferritin-associated ferredoxin                                                                                                |
| B3337                                                             | 3.4         | <i>yheA</i>                    | bacterioferritin-associated ferredoxin                                                                                                |
| B1874                                                             | 3.3         | <i>cutC</i>                    | copper homeostasis protein                                                                                                            |

|                                        |      |                |                                                                                 |
|----------------------------------------|------|----------------|---------------------------------------------------------------------------------|
| B4376                                  | 3.0  | <i>osmY</i>    | hyperosmotically inducible periplasmic protein                                  |
| B4224                                  | 2.8  | <i>chpS</i>    | antitoxin ChpS; suppressor of inhibitory function of ChpB                       |
| B1897                                  | 2.6  | <i>otsB</i>    | trehalose-6-phosphate phosphatase                                               |
| B0966                                  | 2.4  | <i>HSpQ</i>    | heat shock protein                                                              |
| B1531                                  | 2.4  | <i>MarA</i>    | transcriptional activator of defense systems                                    |
| B0226                                  | 2.3  | <i>dinJ</i>    | damage-inducible protein J                                                      |
| B3183                                  | 2.3  | <i>yhbZ</i>    | GTPase involved in chromosome partitioning and ribosome assembly                |
| B1020                                  | 2.1  | <i>phoH</i>    | phosphate starvation-inducible antitoxin of the YoeB-YefM toxin-antitoxin pair  |
| B2017                                  | 2.0  | <i>yefM</i>    |                                                                                 |
| B3286                                  | 2.0  | <i>smf_1</i>   | rf, fragment 1                                                                  |
| B1896                                  | 2.0  | <i>otsA</i>    | trehalose-6-phosphate synthase                                                  |
| <i>Central intermediary metabolism</i> |      |                |                                                                                 |
| B2752                                  | 3.8  | <i>cysD</i>    | sulfate adenylyltransferase subunit 2                                           |
| B0384                                  | 3.5  | <i>psiF</i>    | induced by phosphate starvation                                                 |
| B2751                                  | 2.5  | <i>cysN</i>    | ATP-sulfurylase (ATP:sulfate adenylyltransferase), subunit 1                    |
| B2762                                  | 2.4  | <i>cysH</i>    | 3'-phosphoadenosine 5'-phosphosulfate (PAPS) reductase                          |
| B2529                                  | 2.3  | <i>iscU</i>    | scaffold protein                                                                |
| B1684                                  | 2.3  | <i>sufA</i>    | iron-sulfur cluster assembly scaffold protein                                   |
| B2764                                  | 2.2  | <i>cysJ</i>    | sulfite reductase (NADPH), flavoprotein beta subunit                            |
| B4106                                  | 2.1  | <i>phnC</i>    | ATP-binding component of phosphonate transport                                  |
| B4214                                  | 2.0  | <i>cysQ</i>    | adenosine-3'(2'),5'-bisphosphate nucleotidase                                   |
| <i>DNA metabolism</i>                  |      |                |                                                                                 |
| B1712                                  | 2.6  | <i>himA</i>    | integration host factor (IHF), alpha subunit                                    |
| B3066                                  | 2.0  | <i>dnaG</i>    | DNA biosynthesis DNA primase                                                    |
| <i>Energy metabolism</i>               |      |                |                                                                                 |
| B2582                                  | 13.1 | <i>trxC</i>    | putative thioredoxin-like protein                                               |
| B0849                                  | 4.9  | <i>grxA</i>    | glutaredoxin1 redox coenzyme for glutathione-dependent ribonucleotide reductase |
| B0368                                  | 4.1  | <i>tauD</i>    | taurine dioxygenase, 2-oxoglutarate-dependent                                   |
| B1416                                  | 3.8  | <i>gapC_2</i>  | glyceraldehyde 3-phosphate dehydrogenase C                                      |
| B0608                                  | 3.6  | <i>ybdR</i>    | putative oxidoreductase                                                         |
| B4197                                  | 3.5  | <i>ECs5173</i> | L-xylulose 5-phosphate 3-epimerase                                              |
| B1747                                  | 3.3  | <i>astA</i>    | arginine N-succinyltransferase                                                  |
| B1417                                  | 3.3  | <i>gapC</i>    | glyceraldehyde-3-phosphate dehydrogenase                                        |
| B1417                                  | 3.0  | <i>gapC_1</i>  | glyceraldehyde 3-phosphate dehydrogenase C                                      |
| B2673                                  | 2.8  | <i>nrdH</i>    | glutaredoxin-like protein                                                       |
| B0898                                  | 2.8  | <i>ycaD</i>    | putative transport protein (MFS family)                                         |
| B1678                                  | 2.7  | <i>ynhG</i>    | L,D-transpeptidase                                                              |
| B1478                                  | 2.4  | <i>adhP</i>    | alcohol dehydrogenase                                                           |
| B3494                                  | 2.4  | <i>yhiO</i>    | predicted universal stress (ethanol tolerance) protein B                        |
| B0333                                  | 2.3  | <i>prpC</i>    | putative citrate synthase                                                       |
| B1046                                  | 2.3  | <i>ymdC</i>    | putative synthase                                                               |

---

|                                               |      |                |                                                                                                                      |
|-----------------------------------------------|------|----------------|----------------------------------------------------------------------------------------------------------------------|
| B2696                                         | 2.2  | <i>csrA</i>    | carbon storage regulator, post-translational activator of flhDC expression, regulates biofilm formation, RNA-binding |
| B1476                                         | 2.1  | <i>fdnI</i>    | formate dehydrogenase-N, cytochrome B556(Fdn) gamma subunit, nitrate-inducible                                       |
| B0146                                         | 2.1  | <i>sfsA</i>    | sugar fermentation stimulation protein A                                                                             |
| <i>Fatty acid and phospholipid metabolism</i> |      |                |                                                                                                                      |
| B0221                                         | 2.7  | <i>fadE</i>    | putative acyl-CoA dehydrogenase                                                                                      |
| <i>Hypothetical proteins</i>                  |      |                |                                                                                                                      |
| B4199                                         | 48.2 | <i>yjfY</i>    | Predicted periplasmic protein, YhcN family, function unknown                                                         |
| B1259                                         | 21.7 | <i>yciG</i>    | hypothetical protein                                                                                                 |
| B4050                                         | 15.2 | <i>yjbO</i>    | Effector of phage shock response; over expression reduces motility                                                   |
| B1005                                         | 14.6 | <i>ycdF</i>    | unknown CDS                                                                                                          |
| B0389                                         | 9.5  | <i>yaiA</i>    | hypothetical                                                                                                         |
| B1536                                         | 8.8  | <i>ydeI</i>    | Predicted secreted protein                                                                                           |
| B3238                                         | 8.2  | <i>yhcN</i>    | hypothetical protein                                                                                                 |
| B1257                                         | 8.2  | <i>yciE</i>    | hypothetical                                                                                                         |
| B2086                                         | 7.6  | <i>yegS</i>    | lipid kinase                                                                                                         |
| B3448                                         | 7.5  | <i>yhhA</i>    | conserved protein                                                                                                    |
| B0005                                         | 7.2  | <i>yaaX</i>    | hypothetical protein                                                                                                 |
| B0753                                         | 6.9  | <i>ybgS</i>    | putative homeobox protein                                                                                            |
| B0802                                         | 6.6  | <i>ybiJ</i>    | Predicted periplasmic protein                                                                                        |
| B1195                                         | 6.0  | <i>ymgE</i>    | predicted inner membrane protein                                                                                     |
| B2135                                         | 5.8  | <i>yohC</i>    | hypothetical                                                                                                         |
| B1953                                         | 4.2  | <i>yodD</i>    | hypothetical                                                                                                         |
| B2672                                         | 4.0  | <i>ygaM</i>    | hypothetical protein                                                                                                 |
| B0119                                         | 3.6  | <i>ECs0123</i> | hypothetical                                                                                                         |
| B3003                                         | 3.6  | <i>yghA</i>    | putative oxidoreductase                                                                                              |
| B2630                                         | 3.5  | <i>yfiN</i>    | CP4-57 prophage                                                                                                      |
| B1758                                         | 3.5  | <i>ECs2464</i> | putative cytochrome oxidase                                                                                          |
| B1431                                         | 3.4  | <i>ydcL</i>    | Novel verified lipoprotein                                                                                           |
| B3153                                         | 3.3  | <i>yhbO</i>    | Confers resistance to various stresses, chaperone homolog                                                            |
| B4107                                         | 3.3  | <i>phnB</i>    | hypothetical; PhnB protein                                                                                           |
| B2531                                         | 3.0  | <i>IscR</i>    | DNA-binding transcriptional regulator IscR                                                                           |
| B1188                                         | 2.9  | <i>ycgB</i>    | putative sporulation protein                                                                                         |
| B3000                                         | 2.9  | <i>yghY</i>    | hypothetical protein;<br>carboxymethylenebutenolidase                                                                |
| B2659                                         | 2.7  | <i>csiD</i>    | Carbon starvation induced gene, function unknown                                                                     |
| B2353                                         | 2.7  | <i>tfaS</i>    | CPS-53 (KpLE1) prophage                                                                                              |
| B4217                                         | 2.6  | <i>ytfK</i>    | Hypothetical                                                                                                         |
| B3866                                         | 2.6  | <i>yihI</i>    | conserved protein                                                                                                    |
| B1836                                         | 2.6  | <i>yebV</i>    | hypothetical                                                                                                         |
| B1100                                         | 2.6  | <i>ycfH</i>    | putative metallodependant hydrolase                                                                                  |
| B0057                                         | 2.5  | <i>yabQ</i>    | Hypothetical                                                                                                         |
| B0516                                         | 2.5  | <i>ylbB</i>    | putative hydantoin utilization protein                                                                               |
| B1490                                         | 2.5  | <i>dosC</i>    | hypothetical                                                                                                         |
| B1837                                         | 2.5  | <i>idi</i>     | Isopentenyl diphosphate isomerase, isoprenoid biosynthesis; interconverts                                            |

---

|                                                           |     |             |                                                                                           |
|-----------------------------------------------------------|-----|-------------|-------------------------------------------------------------------------------------------|
|                                                           |     |             | isopentenyl diphosphate (IPP) and dimethylallyl diphosphate (DMAPP)                       |
| B1164                                                     | 2.4 | <i>ycgZ</i> | Hypothetical                                                                              |
| B3246                                                     | 2.4 | <i>yhdP</i> | hypothetical                                                                              |
| B1958                                                     | 2.4 | <i>yedI</i> | putative transmembrane protein                                                            |
| B1298                                                     | 2.3 | <i>puuD</i> | putative amidotransferase subunit                                                         |
| B3598                                                     | 2.3 | <i>yibI</i> | predicted inner membrane protein                                                          |
| B0225                                                     | 2.3 | <i>yafQ</i> | Toxin of TA pair YafQ/DinJ, inhibitor of translation                                      |
| B1649                                                     | 2.3 | <i>nemR</i> | hypothetical                                                                              |
| B3184                                                     | 2.3 | <i>yhbE</i> | hypothetical                                                                              |
| B3000                                                     | 2.3 | <i>yghY</i> | putative enzyme with alpha/beta-hydrolase domain                                          |
| B1957                                                     | 2.2 | <i>yodC</i> | Hypothetical                                                                              |
| B0446                                                     | 2.2 | <i>cof</i>  | hypothetical                                                                              |
| B2666                                                     | 2.1 | <i>ygaE</i> | hypothetical protein                                                                      |
| B2809                                                     | 2.1 | <i>ygdI</i> | hypothetical                                                                              |
| B1955                                                     | 2.1 | <i>yedP</i> | mannosyl-3-phosphoglycerate phosphatase                                                   |
| B3535                                                     | 2.0 | <i>yhjR</i> | hypothetical                                                                              |
| B1952                                                     | 2.0 | <i>dsrB</i> | hypothetical protein; transcription is regulated by RpoS and DsrA RNA                     |
| B1436                                                     | 2.0 | <i>yncJ</i> | unknown CDS                                                                               |
| <i>Mobile and extrachromosomal element functions</i>      |     |             |                                                                                           |
| B1783                                                     | 6.6 | <i>yeaG</i> | Protein kinase                                                                            |
| B1562                                                     | 3.6 | <i>hokD</i> | Qin prophage                                                                              |
| B4209                                                     | 3.6 | <i>ytfE</i> | iron-sulfur cluster repair di-iron protein                                                |
| B0456                                                     | 3.4 | <i>ybaA</i> | hypothetical                                                                              |
| B2528                                                     | 2.2 | <i>iscA</i> | iron-sulfur cluster assembly protein                                                      |
| B0891                                                     | 2.1 | <i>lolA</i> | periplasmic chaperone, effects translocation of lipoproteins from inner membrane to outer |
| B0438                                                     | 2.0 | <i>clpX</i> | ATP-dependent specificity component of clpP serine protease, chaperone                    |
| B3932                                                     | 2.0 | <i>hslV</i> | heat shock protein hslVU, proteasome-related peptidase subunit                            |
| Protein fate                                              |     |             |                                                                                           |
| Protein synthesis                                         |     |             |                                                                                           |
| B1258                                                     | 7.8 | <i>yciF</i> | putative structural proteins                                                              |
| B4373                                                     | 2.0 | <i>rimI</i> | acyltransferase for 30S ribosomal subunit protein S18                                     |
| <i>Purines, pyrimidines, nucleosides, and nucleotides</i> |     |             |                                                                                           |
| B0032                                                     | 2.7 | <i>carA</i> | carbamoyl-phosphate synthetase small subunit                                              |
| B4246                                                     | 2.1 | <i>pyrL</i> | pyrBI operon leader peptide                                                               |
| B2028                                                     | 2.1 | <i>ugd</i>  | UDP-glucose 6-dehydrogenase                                                               |
| B4245                                                     | 2.0 | <i>pyrB</i> | aspartate carbamoyltransferase, catalytic subunit                                         |
| <i>Regulatory functions</i>                               |     |             |                                                                                           |
| B0803                                                     | 3.4 | <i>ybiI</i> | DksA-type zinc finger protein                                                             |
| B0435                                                     | 3.2 | <i>bolA</i> | putative regulator of murein genes                                                        |
| B0232                                                     | 2.8 | <i>yafN</i> | predicted toxin of the YafO-YafN toxin-antitoxin system                                   |
| B0450                                                     | 2.8 | <i>glnK</i> | nitrogen regulatory protein P-II 2                                                        |

|                                       |     |                  |                                                             |
|---------------------------------------|-----|------------------|-------------------------------------------------------------|
| B2573                                 | 2.6 | <i>rpoE</i>      | RNA polymerase, sigma-E factor                              |
| B0399                                 | 2.6 | <i>PhoB</i>      | Phosphorylated transcriptional dual regulator               |
| B1040                                 | 2.6 | <i>CsgD</i>      | DNA-binding transcriptional regulator CsgD                  |
| B3555                                 | 2.5 | <i>yiaG</i>      | putative transcriptional regulator                          |
| B0453                                 | 2.5 | <i>ybaY</i>      | glycoprotein/polysaccharide metabolism                      |
| B1988                                 | 2.0 | <i>nac</i>       | nitrogen assimilation control protein                       |
| B0460                                 | 2.0 | <i>hha</i>       | haemolysin expression modulating protein                    |
| B2572                                 | 2.0 | <i>rseA</i>      | anti sigma E (sigma 24) factor, negative regulator          |
| Transcription                         |     |                  |                                                             |
| B3780                                 | 2.4 | <i>rhlB</i>      | putative ATP-dependent RNA helicase                         |
| B2567                                 | 2.3 | <i>rnc</i>       | RNase III                                                   |
| <i>Transport and binding proteins</i> |     |                  |                                                             |
| B4002                                 | 8.8 | <i>zraP/yjaI</i> | Zn-binding periplasmic protein                              |
| B0365                                 | 5.5 | <i>tauA</i>      | taurine transport protein (ABC superfamily, peri_bind)      |
| B3728                                 | 5.0 | <i>pstS</i>      | high-affinity phosphate-specific transport system           |
| B0366                                 | 4.7 | <i>tauB</i>      | taurine ATP-binding component of a transport system         |
| B2425                                 | 3.5 | <i>cysP</i>      | thiosulfate binding protein                                 |
| B0914                                 | 2.9 | <i>msbA</i>      | ATP-binding transport protein                               |
| B0461                                 | 2.6 | <i>cusB</i>      | membrane fusion protein of the CusCFBA copper efflux system |
| B0367                                 | 2.1 | <i>tauC</i>      | taurine transport system permease protein                   |
| B3006                                 | 2.0 | <i>exbB</i>      | uptake of enterobactin                                      |
| B1710                                 | 2.0 | <i>btuE</i>      | putative glutathione peroxidase                             |

| <b>Gene Number</b>                                                | <b>Fold Change</b> | <b>Symbol</b> | <b>Function</b>                                                                   |
|-------------------------------------------------------------------|--------------------|---------------|-----------------------------------------------------------------------------------|
| <i>Amino acid biosynthesis</i>                                    |                    |               |                                                                                   |
| B2871                                                             | -3.8               | <i>ygeX</i>   | putative dehydratase                                                              |
| B0003                                                             | -2.3               | <i>thrB</i>   | homoserine kinase                                                                 |
| B2878                                                             | -2.3               | <i>ygfK</i>   | putative oxidoreductase, Fe-S subunit                                             |
| B2329                                                             | -2.2               | <i>aroC</i>   | chorismate synthase                                                               |
| <i>Biofilm</i>                                                    |                    |               |                                                                                   |
| B0836                                                             | -6.1               | <i>bssR</i>   | biofilm formation regulatory protein BssR                                         |
| <i>Biosynthesis of cofactors, prosthetic groups, and carriers</i> |                    |               |                                                                                   |
| B1593                                                             | -2.8               | <i>ynfK</i>   | putative dithiobiotin synthetase                                                  |
| B3209                                                             | -2.1               | <i>yhbL</i>   | isoprenoid biosynthesis protein with amidotransferase-like domain                 |
| B3805                                                             | -2.0               | <i>hemC</i>   | hydroxymethylbilane synthase (porphobilinogen deaminase)                          |
| <i>Cell envelope</i>                                              |                    |               |                                                                                   |
| B1256                                                             | -24.5              | <i>ompW</i>   | OmpW, outer membrane protein                                                      |
| B4314                                                             | -13.2              | <i>fimA</i>   | major type 1 subunit fimbrin (pilin)                                              |
| B3506                                                             | -11.9              | <i>slp</i>    | Slp outer membrane lipoprotein                                                    |
| B0957                                                             | -4.0               | <i>ompA</i>   | outer membrane protein 3a                                                         |
| B0087                                                             | -2.8               | <i>mraY</i>   | phospho-N-acetylmuramoyl-pentapeptide transferase                                 |
| B4315                                                             | -2.3               | <i>fimI</i>   | fimbrial protein                                                                  |
| B0091                                                             | -2.1               | <i>murC</i>   | UDP-N-acetyl-muramate:alanine ligase                                              |
| B0092                                                             | -2.0               | <i>ddlB</i>   | D-alanine-D-alanine ligase B                                                      |
| B2742                                                             | -2.0               | <i>nlpD</i>   | lipoprotein                                                                       |
| <i>Cellular processes</i>                                         |                    |               |                                                                                   |
| B1492                                                             | -14.0              | <i>gadC</i>   | acid sensitivity protein, putative transporter                                    |
| B1656                                                             | -13.5              | <i>sodB</i>   | superoxide dismutase, iron                                                        |
| B0880                                                             | -6.9               | <i>cspD</i>   | cold shock protein                                                                |
| B3509                                                             | -6.5               | <i>hdeB</i>   | acid stress chaperone                                                             |
| B3510                                                             | -6.2               | <i>hdeA</i>   | Periplasmic chaperone of acid-denatured proteins; H-NS repressed                  |
| B2579                                                             | -6.0               | <i>yfiD</i>   | stress-induced alternate pyruvate formate-lyase subunit                           |
| B0607                                                             | -5.4               | <i>uspG</i>   | universal stress protein G                                                        |
| B1905                                                             | -5.0               | <i>ftn</i>    | cytoplasmic ferritin (an iron storage protein)                                    |
| B3495                                                             | -4.6               | <i>uspA</i>   | universal stress protein                                                          |
| B0598                                                             | -4.5               | <i>cstA</i>   | carbon starvation protein                                                         |
| B3942                                                             | -4.5               | <i>katG</i>   | catalase                                                                          |
| B3339                                                             | -4.2               | <i>tufA</i>   | protein chain elongation factor EF-Tu                                             |
| B0990                                                             | -3.4               | <i>cspG</i>   | homolog of Salmonella cold shock protein                                          |
| B3556                                                             | -3.4               | <i>cspA</i>   | cold shock protein 7.4, transcriptional activator of hns                          |
| B0095                                                             | -3.3               | <i>ftsZ</i>   | cell division                                                                     |
| B3511                                                             | -2.9               | <i>hdeD</i>   | acid-resistance membrane protein                                                  |
| B1552                                                             | -2.9               | <i>cspI</i>   | Qin prophage, cold shock protein                                                  |
| B3928                                                             | -2.7               | <i>yiiU</i>   | cell division factor ZapB                                                         |
| B0094                                                             | -2.5               | <i>ftsA</i>   | Cell division protein FtsA                                                        |
| B1557                                                             | -2.4               | <i>cspB</i>   | Qin prophage; cold shock protein; predicted DNA-binding transcriptional regulator |
| B0093                                                             | -2.4               | <i>ftsQ</i>   | Cell division protein FtsQ                                                        |
| B1324                                                             | -2.4               | <i>tpx</i>    | thiol peroxidase                                                                  |
| B3336                                                             | -2.2               | <i>bfr</i>    | bacterioferrin, an iron storage homoprotein                                       |

|                                        |       |             |                                                                                                  |
|----------------------------------------|-------|-------------|--------------------------------------------------------------------------------------------------|
| B1333                                  | -2.1  | <i>ydaA</i> | Stress-induced protein; UV-resistance; tandem Usp domains                                        |
| B1175                                  | -2.0  | <i>minD</i> | cell division inhibitor, a membrane ATPase, activates minC                                       |
| <i>Central intermediary metabolism</i> |       |             |                                                                                                  |
| B3945                                  | -7.1  | <i>gldA</i> | glycerol dehydrogenase, (NAD)                                                                    |
| B2095                                  | -6.4  | <i>gatZ</i> | putative tagatose 6-phosphate kinase 1                                                           |
| B2727                                  | -2.9  | <i>hypB</i> | guanine-nucleotide binding protein, functions as nickel donor for large subunit of hydrogenase 3 |
| <i>DNA metabolism</i>                  |       |             |                                                                                                  |
| B0440                                  | -3.1  | <i>hupB</i> | DNA-binding protein HU-beta, NS1 (HU-1)                                                          |
| Z2013                                  | -2.3  | <i>hns</i>  | DNA-binding protein HLP-II (HU, BH2, HD, NS)                                                     |
| B4000                                  | -2.1  | <i>hupA</i> | DNA-binding protein HU-alpha (HU-2)                                                              |
| <i>Energy metabolism</i>               |       |             |                                                                                                  |
| B3708                                  | -33.0 | <i>tnaA</i> | tryptophanase                                                                                    |
| B3517                                  | -17.4 | <i>gadA</i> | glutamate decarboxylase isozyme                                                                  |
| B0733                                  | -15.7 | <i>cydA</i> | cytochrome d terminal oxidase polypeptide subunit I                                              |
| B2957                                  | -15.4 | <i>ansB</i> | periplasmic L-asparaginase II                                                                    |
| B1064                                  | -11.7 | <i>grxB</i> | glutaredoxin 2                                                                                   |
| B2091                                  | -10.7 | <i>gatD</i> | galactitol-1-phosphate dehydrogenase                                                             |
| B0972                                  | -10.4 | <i>hyaA</i> | hydrogenase-1 small subunit                                                                      |
| B0734                                  | -9.0  | <i>cydB</i> | cytochrome d terminal oxidase polypeptide subunit II                                             |
| B1224                                  | -8.8  | <i>narG</i> | nitrate reductase 1, alpha subunit                                                               |
| B1226                                  | -8.1  | <i>narJ</i> | nitrate reductase 1, delta subunit, assembly function                                            |
| B0485                                  | -7.9  | <i>ybaS</i> | putative glutaminase                                                                             |
| B2904                                  | -6.8  | <i>gcvH</i> | glycine cleavage system H protein                                                                |
| B4154                                  | -5.8  | <i>frdA</i> | fumarate reductase, anaerobic, catalytic and NAD/flavoprotein subunit                            |
| B1225                                  | -5.4  | <i>narH</i> | nitrate reductase 1, Fe-S (beta) subunit                                                         |
| B4153                                  | -5.0  | <i>frdB</i> | FrdB                                                                                             |
| B2096                                  | -4.8  | <i>gatY</i> | tagatose 6-phosphate aldolase 2, subunit with GatZ                                               |
| B0976                                  | -4.6  | <i>hyaE</i> | processing of HyaA and HyaB proteins                                                             |
| B0973                                  | -4.5  | <i>hyaB</i> | hydrogenase-1 large subunit                                                                      |
| B2905                                  | -4.5  | <i>gcvT</i> | aminomethyltransferase                                                                           |
| B0723                                  | -4.5  | <i>sdhA</i> | succinate dehydrogenase, flavoprotein subunit                                                    |
| B2096                                  | -4.4  | <i>gatY</i> | tagatose 6-phosphate aldolase 2, subunit with GatZ                                               |
| B1002                                  | -4.1  | <i>agp</i>  | periplasmic glucose-1-phosphatase                                                                |
| B0895                                  | -3.8  | <i>dmsB</i> | anaerobic dimethyl sulfoxide (DMSO) reductase, subunit B                                         |
| B3403                                  | -3.7  | <i>pckA</i> | phosphoenolpyruvate carboxykinase                                                                |
| B0974                                  | -3.6  | <i>hyaC</i> | probable Ni/Fe-hydrogenase 1 b-type cytochrome subunit                                           |
| B3049                                  | -3.5  | <i>glgS</i> | glycogen biosynthesis, rpoS dependent                                                            |
| B1603                                  | -3.5  | <i>pntA</i> | pyridine nucleotide transhydrogenase alpha subunit                                               |
| B4014                                  | -3.4  | <i>aceB</i> | malate synthase A                                                                                |
| B1136                                  | -3.4  | <i>icd</i>  | isocitrate dehydrogenase                                                                         |
| B4139                                  | -3.3  | <i>aspA</i> | aspartate ammonia-lyase                                                                          |
| B2800                                  | -3.3  | <i>fucA</i> | L-fuculose-1-phosphate aldolase                                                                  |
| B4152                                  | -3.2  | <i>frdC</i> | fumarate reductase, anaerobic, membrane anchor polypeptide                                       |
| B0116                                  | -3.2  | <i>lpdA</i> | dihydrolipoamide dehydrogenase, FAD/NAD(P)-binding,                                              |



---

|       |      |             |                                                                                        |
|-------|------|-------------|----------------------------------------------------------------------------------------|
|       |      |             | component of the 2-oxoglutarate dehydrogenase and the pyruvate dehydrogenase complexes |
| B3893 | -3.1 | <i>fdoH</i> | formate dehydrogenase-O iron-sulfur subunit                                            |
| B2097 | -3.1 | <i>fbaB</i> | fructose-bisphosphate aldolase class I                                                 |
| B0722 | -3.0 | <i>sdhD</i> | succinate dehydrogenase hydrophobic subunit                                            |
| B4015 | -3.0 | <i>aceA</i> | isocitrate lyase                                                                       |
| B2997 | -2.9 | <i>hybO</i> | hydrogenase 2 small subunit                                                            |
| B0756 | -2.9 | <i>galM</i> | galactose-1-epimerase (mutarotase)                                                     |
| B3733 | -2.8 | <i>atpG</i> | F-type H <sup>+</sup> -transporting ATPase subunit gamma                               |
| B3236 | -2.8 | <i>mdh</i>  | malate dehydrogenase                                                                   |
| B4071 | -2.7 | <i>nrfB</i> | formate-dependent nitrite reductase NrfB                                               |
| B3236 | -2.7 | <i>mdh</i>  | malate dehydrogenase                                                                   |
| B1276 | -2.7 | <i>acnA</i> | aconitate hydratase 1                                                                  |
| B1589 | -2.6 | <i>ynfG</i> | putative dimethyl sulfoxide reductase, Fe-S subunit                                    |
| B3894 | -2.6 | <i>fdoG</i> | formate dehydrogenase-O major subunit                                                  |
| B1588 | -2.6 | <i>ynfF</i> | putative dimethyl sulfoxide reductase, major subunit                                   |
| B1587 | -2.6 | <i>ynfE</i> | putative oxidoreductase major subunit                                                  |
|       |      |             | part of glycogen operon, a glycosyl hydrolase, debranching enzyme                      |
| B3431 | -2.6 | <i>glgX</i> |                                                                                        |
| B2277 | -2.6 | <i>nuoM</i> | NADH dehydrogenase I chain M                                                           |
| B0727 | -2.6 | <i>sucB</i> | dihydrolipoamide succinyltransferase                                                   |
| B0729 | -2.6 | <i>sucD</i> | succinyl-CoA synthetase alpha subunit                                                  |
| B3617 | -2.5 | <i>kbl</i>  | 2-amino-3-ketobutyrate CoA ligase                                                      |
| B0894 | -2.5 | <i>dmsA</i> | anaerobic dimethyl sulfoxide reductase subunit A                                       |
| B3430 | -2.5 | <i>glgC</i> | glucose-1-phosphate adenylyltransferase                                                |
| B2133 | -2.5 | <i>dld</i>  | D-lactate dehydrogenase                                                                |
| B2799 | -2.5 | <i>fucO</i> | L-1,2-propanediol oxidoreductase                                                       |
| B0724 | -2.5 | <i>sdhB</i> | succinate dehydrogenase, iron sulfur protein                                           |
| B2870 | -2.4 | <i>ygeW</i> | putative carbamoyl transferase                                                         |
|       |      |             | fumarate reductase, anaerobic, membrane anchor                                         |
| B4151 | -2.4 | <i>frdD</i> | polypeptide                                                                            |
| B3429 | -2.4 | <i>glgA</i> | glycogen synthase                                                                      |
| B1854 | -2.4 | <i>pykA</i> | pyruvate kinase II, glucose stimulated                                                 |
| B0721 | -2.3 | <i>sdhC</i> | succinate dehydrogenase                                                                |
| B2286 | -2.2 | <i>nuoC</i> | NADH dehydrogenase I chain C, D                                                        |
| B0897 | -2.2 | <i>ycaC</i> | putative cysteine hydrolase                                                            |
| B2996 | -2.2 | <i>hybA</i> | hydrogenase-2 small subunit                                                            |
| B2995 | -2.2 | <i>hybB</i> | probable cytochrome Ni/Fe component of hydrogenase-2                                   |
| B3049 | -2.2 | <i>glgS</i> | glycogen biosynthesis, rpoS dependent                                                  |
| B0728 | -2.2 | <i>sucC</i> | succinyl-CoA synthetase beta subunit                                                   |
| B2284 | -2.1 | <i>nuoF</i> | NADH dehydrogenase I chain F                                                           |
| B0977 | -2.1 | <i>hyaF</i> | nickel incorporation into hydrogenase-1 proteins                                       |
| B1590 | -2.1 | <i>ynfH</i> | putative DMSO reductase anchor subunit                                                 |
| B3892 | -2.1 | <i>fdol</i> | formate dehydrogenase cytochrome B556 (FDO) subunit                                    |
| B2288 | -2.0 | <i>nuoA</i> | NADH dehydrogenase I chain A                                                           |
| B2279 | -2.0 | <i>nuoK</i> | NADH dehydrogenase I chain K                                                           |
| B1227 | -2.0 | <i>narI</i> | nitrate reductase 1, cytochrome b(NR), gamma subunit                                   |
| B4079 | -2.0 | <i>fdhF</i> | formate dehydrogenase                                                                  |
| B2282 | -2.0 | <i>nuoH</i> | NADH dehydrogenase I chain H                                                           |
| B2935 | -2.0 | <i>tktA</i> | transketolase 1 isozyme                                                                |
| B0726 | -2.0 | <i>sucA</i> | 2-oxoglutarate dehydrogenase decarboxylase component                                   |

---

---

|                                                      |      |                |                                                                                                   |
|------------------------------------------------------|------|----------------|---------------------------------------------------------------------------------------------------|
| <i>Fatty acid and phospholipid metabolism</i>        |      |                |                                                                                                   |
| B2426                                                | -4.2 | <i>ucpA</i>    | short chain dehydrogenase                                                                         |
| B1199                                                | -2.6 | <i>dhaL</i>    | putative dihydroxyacetone kinase (EC 2.7.1.2)                                                     |
| B2323                                                | -2.5 | <i>fabB</i>    | 3-oxoacyl-[acyl-carrier-protein] synthase I                                                       |
| B1093                                                | -2.2 | <i>fabG</i>    | 3-ketoacyl-(acyl-carrier-protein) reductase                                                       |
| B1288                                                | -2.0 | <i>fabI</i>    | enoyl-[acyl-carrier-protein] reductase (NADH)                                                     |
| <i>Hypothetical proteins</i>                         |      |                |                                                                                                   |
| B1376                                                | -9.4 | <i>ynaF</i>    | nucleotide binding filament protein                                                               |
| B3207                                                | -4.5 | <i>yrbL</i>    | hypothetical                                                                                      |
| B2146                                                | -4.5 | <i>yeiT</i>    | putative oxidoreductase                                                                           |
| B1667                                                | -4.1 | <i>ydhR</i>    | Lipid A biosynthesis, KDO2-lipid IVA palmitoleoyl-ACP acyltransferase; cold temperature inducible |
| B1777                                                | -3.4 | <i>yeaC</i>    | hypothetical                                                                                      |
| B1420                                                | -3.4 | <i>mokB</i>    | hypothetical                                                                                      |
| B4380                                                | -3.4 | <i>yjiI</i>    | hypothetical                                                                                      |
| B4330                                                | -3.1 | <i>yjiH</i>    | hypothetical                                                                                      |
| B3024                                                | -2.6 | <i>ygiW</i>    | Secreted protein, function unknown                                                                |
| B3929                                                | -2.6 | <i>menG</i>    | menaquinone biosynthesis, unknown                                                                 |
| B0442                                                | -2.5 | <i>ybaV</i>    | Competence protein ComEA homolog, function unknown                                                |
| B3011                                                | -2.5 | <i>yqhD</i>    | putative oxidoreductase                                                                           |
| B1000                                                | -2.5 | <i>cbpA</i>    | curved DNA-binding protein                                                                        |
| B0097                                                | -2.4 | <i>yacA</i>    | Secretion monitor controlling secA expression                                                     |
| B2909                                                | -2.4 | <i>ygfB</i>    | hypothetical                                                                                      |
| B1765                                                | -2.3 | <i>ydiA</i>    | hypothetical                                                                                      |
| ECS2704                                              | -2.3 | <i>ECs2704</i> | hypothetical                                                                                      |
| B2880                                                | -2.3 | <i>ygfM</i>    | Methionine sulfoxide reductase A; specific for S diastereoisomers                                 |
| B4187                                                | -2.3 | <i>aidB</i>    | putative acyl coenzyme A dehydrogenase                                                            |
| B1541                                                | -2.3 | <i>ydfZ</i>    | hypothetical                                                                                      |
| B2584                                                | -2.3 | <i>yfiQ</i>    | fused predicted acyl-CoA synthetase: NAD(P)-binding subunit, ATP-binding subunit                  |
| B2343                                                | -2.2 | <i>yfcZ</i>    | hypothetical                                                                                      |
| B2532                                                | -2.2 | <i>trmJ</i>    | putative ATP synthase beta subunit                                                                |
| B4329                                                | -2.2 | <i>yjiG</i>    | hypothetical                                                                                      |
| B1426                                                | -2.2 | <i>ydcH</i>    | hypothetical                                                                                      |
| B1108                                                | -2.2 | <i>ycfP</i>    | putative hydrolase                                                                                |
| B3803                                                | -2.1 | <i>hemX</i>    | uroporphyrinogen III methylase                                                                    |
| B2795                                                | -2.1 | <i>ygdH</i>    | hypothetical                                                                                      |
| B4179                                                | -2.1 | <i>rnr</i>     | hypothetical                                                                                      |
| B2876                                                | -2.1 | <i>yqeC</i>    | hypothetical                                                                                      |
| B2897                                                | -2.0 | <i>ygfY</i>    | hypothetical                                                                                      |
| B0488                                                | -2.0 | <i>ybbJ</i>    | Stimulates ftsH htpX mutant suppressor activity of QmcA                                           |
| B1067                                                | -2.0 | <i>yceH</i>    | hypothetical                                                                                      |
| <i>Mobile and extrachromosomal element functions</i> |      |                |                                                                                                   |
| B2449                                                | -2.2 | <i>yffR</i>    | CPZ-55 prophage                                                                                   |
| B2192                                                | -2.1 | <i>trs5_8</i>  | IS5 transposase and trans-activator                                                               |
| <i>Protein fate</i>                                  |      |                |                                                                                                   |
| B1967                                                | -7.2 | <i>hchA</i>    | chaperone protein HchA                                                                            |
| B4143                                                | -7.2 | <i>mopA</i>    | GroEL, chaperone Hsp60, peptide-dependent ATPase, heat shock protein                              |
| B0975                                                | -5.1 | <i>hyaD</i>    | processing of HyaA and HyaB proteins                                                              |

---

|                                                           |      |               |                                                                                                                                                                                                       |
|-----------------------------------------------------------|------|---------------|-------------------------------------------------------------------------------------------------------------------------------------------------------------------------------------------------------|
| B0014                                                     | -3.4 | <i>dnaK</i>   | molecular chaperone DnaK                                                                                                                                                                              |
| B1778                                                     | -3.3 | <i>msrB</i>   | methionine sulfoxide reductase B                                                                                                                                                                      |
| B2908                                                     | -3.2 | <i>pepP</i>   | proline aminopeptidase P II                                                                                                                                                                           |
| B2726                                                     | -3.0 | <i>hypA</i>   | guanine-nucleotide-binding protein in formate-hydrogenlyase system, functions as nickel donor for HycE of hydrogenlyase 3                                                                             |
| B3103                                                     | -2.7 | <i>yhaH</i>   | putative cytochrome                                                                                                                                                                                   |
| B3300                                                     | -2.7 | <i>prlA</i>   | preprotein translocase, membrane component, transport across inner membrane (General Secretory Pathway)                                                                                               |
| B2872                                                     | -2.6 | <i>ygeY</i>   | putative deacetylase                                                                                                                                                                                  |
| B0932                                                     | -2.2 | <i>pepN</i>   | aminopeptidase N                                                                                                                                                                                      |
| B4142                                                     | -2.2 | <i>mopB</i>   | GroES, 10 Kd chaperone binds to Hsp60 in pres. Mg-ATP, suppressing its ATPase activity                                                                                                                |
| B2728                                                     | -2.1 | <i>hypC</i>   | pleiotrophic effects on 3 hydrogenase isozymes                                                                                                                                                        |
| <i>Protein synthesis</i>                                  |      |               |                                                                                                                                                                                                       |
| B0953                                                     | -4.8 | <i>rmf</i>    | ribosome modulation factor                                                                                                                                                                            |
| B3305                                                     | -4.0 | <i>rplF</i>   | 50S ribosomal subunit protein L6                                                                                                                                                                      |
| B4129                                                     | -3.8 | <i>lysU</i>   | lysine tRNA synthetase, inducible                                                                                                                                                                     |
| B3304                                                     | -3.1 | <i>rplR</i>   | 50S ribosomal subunit protein L18                                                                                                                                                                     |
| B3299                                                     | -3.0 | <i>rpmJ</i>   | 50S ribosomal subunit protein L36                                                                                                                                                                     |
| B0865                                                     | -3.0 | <i>ybjP</i>   | putative lipoprotein                                                                                                                                                                                  |
| B3306                                                     | -2.8 | <i>rpsH</i>   | 30S ribosomal subunit protein S8                                                                                                                                                                      |
| B2607                                                     | -2.8 | <i>trmD</i>   | tRNA (guanine-7-)-methyltransferase                                                                                                                                                                   |
| B3301                                                     | -2.5 | <i>rplO</i>   | 50S ribosomal subunit protein L15                                                                                                                                                                     |
| B3303                                                     | -2.5 | <i>rpsE</i>   | 30S ribosomal subunit protein S5                                                                                                                                                                      |
| B3340                                                     | -2.5 | <i>fusA</i>   | GTP-binding protein chain elongation factor EF-G                                                                                                                                                      |
| B2606                                                     | -2.4 | <i>rplS</i>   | 50S ribosomal subunit protein L19                                                                                                                                                                     |
| B1480                                                     | -2.4 | <i>rpsV</i>   | 30S ribosomal subunit protein S22                                                                                                                                                                     |
| B3302                                                     | -2.3 | <i>rpmD</i>   | 50S ribosomal subunit protein L30                                                                                                                                                                     |
| B3308                                                     | -2.3 | <i>rplE</i>   | 50S ribosomal subunit protein L5                                                                                                                                                                      |
| B3307                                                     | -2.2 | <i>RpsN</i>   | 30S ribosomal subunit protein S14                                                                                                                                                                     |
| B2292                                                     | -2.0 | <i>yfbS</i>   | putative transport protein                                                                                                                                                                            |
| B3309                                                     | -2.0 | <i>rplX</i>   | 50S ribosomal subunit protein L24                                                                                                                                                                     |
| <i>Purines, pyrimidines, nucleosides, and nucleotides</i> |      |               |                                                                                                                                                                                                       |
| B2147                                                     | -4.3 | <i>yeiA</i>   | putative dihydropyrimidine dehydrogenase, FMN-linked                                                                                                                                                  |
| B4177                                                     | -3.1 | <i>purA</i>   | adenylosuccinate synthetase                                                                                                                                                                           |
| <i>Regulatory functions</i>                               |      |               |                                                                                                                                                                                                       |
| B2597                                                     | -5.7 | <i>raiA</i>   | ribosome-associated inhibitor A                                                                                                                                                                       |
| B4062                                                     | -4.9 | <i>soxS</i>   | regulation of superoxide response regulon                                                                                                                                                             |
| B3357                                                     | -3.1 | <i>crp</i>    | cyclic AMP receptor protein                                                                                                                                                                           |
| B0999                                                     | -2.9 | <i>yccD</i>   | Modulator of CbpA co-chaperone activity                                                                                                                                                               |
| B0812                                                     | -2.9 | <i>dps</i>    | global regulator, starvation conditions                                                                                                                                                               |
| B2090                                                     | -2.4 | <i>gatR_2</i> | split galactitol utilization operon repressor, fragment 2                                                                                                                                             |
| B0487                                                     | -2.3 | <i>cueR</i>   | putative transcriptional regulator                                                                                                                                                                    |
| B3461                                                     | -2.2 | <i>rpoH</i>   | RNA polymerase, sigma(32) factor                                                                                                                                                                      |
| B2898                                                     | -2.2 | <i>ygfZ</i>   | Hda suppressor; also involved in methylthio modification at 2-methylthio-6-iodoadenosine in tRNA; mutants grow slowly, especially at low temperature; slow growth is suppressed by MnmE; binds folate |
| B3912                                                     | -2.0 | <i>cpxR</i>   | response regulator in two-component regulatory system with CpxA, regulates expression of stress-related genes (OmpR family)                                                                           |

---

*Transport and binding proteins*

|       |       |             |                                                  |
|-------|-------|-------------|--------------------------------------------------|
| B2094 | -13.7 | <i>gatA</i> | PTS family enzyme IIA, galactitol-specific       |
| B2092 | -13.1 | <i>gatC</i> | PTS system galactitol-specific enzyme IIC        |
| B2093 | -10.3 | <i>gatB</i> | PTS family enzyme IIB, galactitol-specific       |
| B3751 | -9.6  | <i>rbsB</i> | D-ribose periplasmic binding protein             |
| B2215 | -7.1  | <i>ompC</i> | OmpC outer membrane porin C                      |
| B0904 | -3.7  | <i>focA</i> | probable formate transporter (formate channel 1) |
| B0486 | -3.3  | <i>ybaT</i> | putative amino acid/amine transport protein      |
| B0553 | -2.5  | <i>nmpC</i> | DLP12 prophage                                   |
| B1818 | -2.5  | <i>manY</i> | PTS enzyme IIC, mannose-specific                 |
| B3161 | -2.4  | <i>mtr</i>  | tryptophan-specific transport protein            |
| B0019 | -2.2  | <i>nhaA</i> | Na <sup>+</sup> /H antiporter, pH dependent      |
| B0484 | -2.1  | <i>copA</i> | Cu(I)-translocation P-type ATPase                |
| B3093 | -2.1  | <i>exuT</i> | hexuronate transport protein (MFS family)        |

---
